# Supplementary material for: The Gender Backlash in the Vote for Brexit
Source: Springer Nature journal article supplement (doi:10.1007/s11109-021-09704-y), 2021-04-03

## Appendix

*Table A1. Variable descriptions*

| Variable                            | Survey item/s                                                                                                                                                                                                                                                            | Coding                                                                                                                   |
|-------------------------------------|--------------------------------------------------------------------------------------------------------------------------------------------------------------------------------------------------------------------------------------------------------------------------|--------------------------------------------------------------------------------------------------------------------------|
| <b>Age</b>                          | Age                                                                                                                                                                                                                                                                      | Linear                                                                                                                   |
| <b>Gender</b>                       | Gender                                                                                                                                                                                                                                                                   | Male = 1<br>Female = 2                                                                                                   |
| <b>Education level</b>              | Highest educational qualification                                                                                                                                                                                                                                        | None = 1<br>GCSE = 2<br>A Level = 3<br>Degree = 4                                                                        |
| <b>Household income</b>             | Annual gross household income                                                                                                                                                                                                                                            | 1 thru 15 where<br>1 = 'under £5000'<br>15 = '£150,000 and above'                                                        |
| <b>Social class</b>                 | Do you ever think of yourself as<br>Belonging to any particular class?                                                                                                                                                                                                   | 1 = no/none<br>2 = middle class<br>3 = working class                                                                     |
| <b>Work status</b>                  | Working Status W10                                                                                                                                                                                                                                                       | 1 = working<br>2 = not in paid work<br>(retired, unemployed, not<br>working)<br>3 = other (student, other)               |
| <b>Marital status</b>               | Profile variable: Marital status W10                                                                                                                                                                                                                                     | 1 = married, in a civil<br>partnership, living with a<br>partner but neither married,<br>widowed<br>0 = single, divorced |
| <b>Immigration attitudes</b>        | Do you think immigration is good or bad for<br>Britain's economy?                                                                                                                                                                                                        | 1 = Bad for economy<br>7 = Good for economy<br>Don't know dropped                                                        |
| <b>Liberal-authoritarian values</b> | Additive 0-10 scale from:<br>How much do you agree or disagree with the<br>following statements?<br>-[a1] Young people today don't have enough<br>respect for traditional British values<br>-[a2] For some crimes, the death penalty is<br>the most appropriate sentence | 0 = most liberal<br>10 = most authoritarian                                                                              |

- 
- [al3] Schools should teach children to obey authority
  - [al4] Censorship of films and magazines is necessary to uphold moral standards
  - [al5] People who break the law should be given stiffer sentences

**Left-right values**

Additive 0-10 scale from:  
How much do you agree or disagree with the following statements?

0 = most left  
10 = most right

- [lr1] Government should redistribute income from the better off to those who are less well off
- [lr2] Big business takes advantage of ordinary people
- [lr3] Ordinary working people do not get their fair share of the nation's wealth
- [lr4] There is one law for the rich and one for the poor
- [lr5] Management will always try to get the better of employees if it gets the chance

**British identity**

Where would you place yourself on these scales: British

1 = not at all British  
7 = very strongly British

---

Table A.2: OLS regression model of male discrimination perceptions, by age, gender, and employment

|                             | menw10              |
|-----------------------------|---------------------|
| Not in paid work            | 0.662<br>(0.205)**  |
| Other                       | -0.146<br>(0.218)   |
| Age                         | 0.004<br>(0.002)    |
| Not in paid work*Age        | -0.012<br>(0.004)** |
| Other*Age                   | 0.008<br>(0.007)    |
| Gender                      | -1.508<br>(0.154)** |
| Not in paid work*Gender     | -0.170<br>(0.286)   |
| Other*Gender                | 0.053<br>(0.305)    |
| Gender*Age                  | 0.003<br>(0.003)    |
| Not in paid work*Gender*Age | 0.003<br>(0.005)    |
| Other*Gender*Age            | -0.006<br>(0.009)   |
| Income                      | -0.002<br>(0.003)   |
| GCSE                        | -0.048<br>(0.058)   |
| A-Level                     | 0.011<br>(0.059)    |
| Degree                      | -0.096<br>(0.056)   |
| Spouse                      | 0.138<br>(0.037)**  |
| Left-Right                  | 0.170<br>(0.009)**  |
| Libertarian-Authoritarian   | 0.175<br>(0.008)**  |
| Constant                    | 2.900<br>(0.131)**  |
| R <sup>2</sup>              | 0.14                |
| N                           | 17,260              |

\*  $p < 0.05$ ; \*\*  $p < 0.01$



Figure A.1(c): Predicted discrimination attitudes for men and women, by education (including controls for left-right and liberal-authoritarian values)

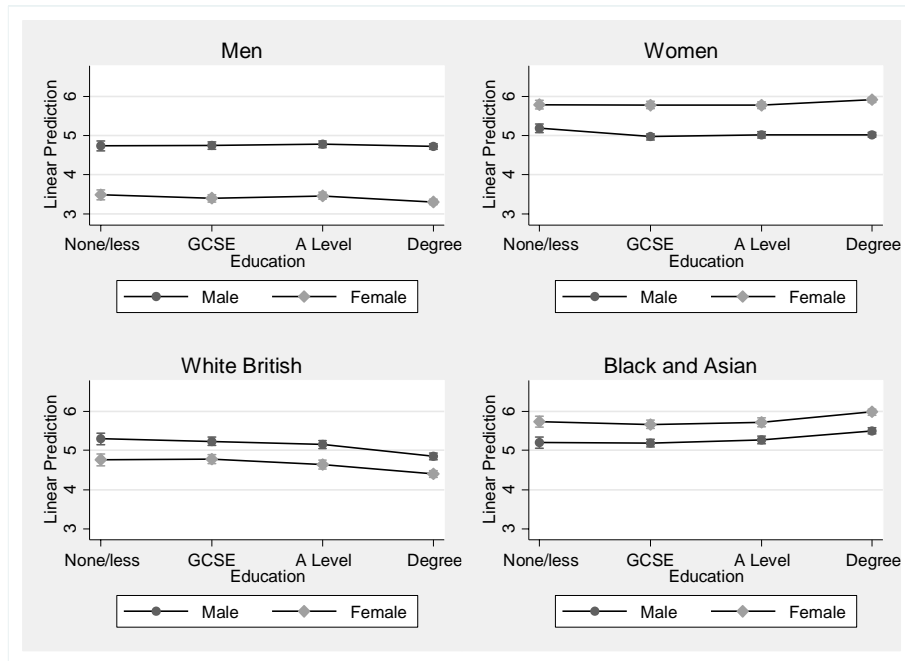

Figure A.1(d): Predicted discrimination attitudes for men and women, by education (excluding controls for left-right and liberal-authoritarian values)

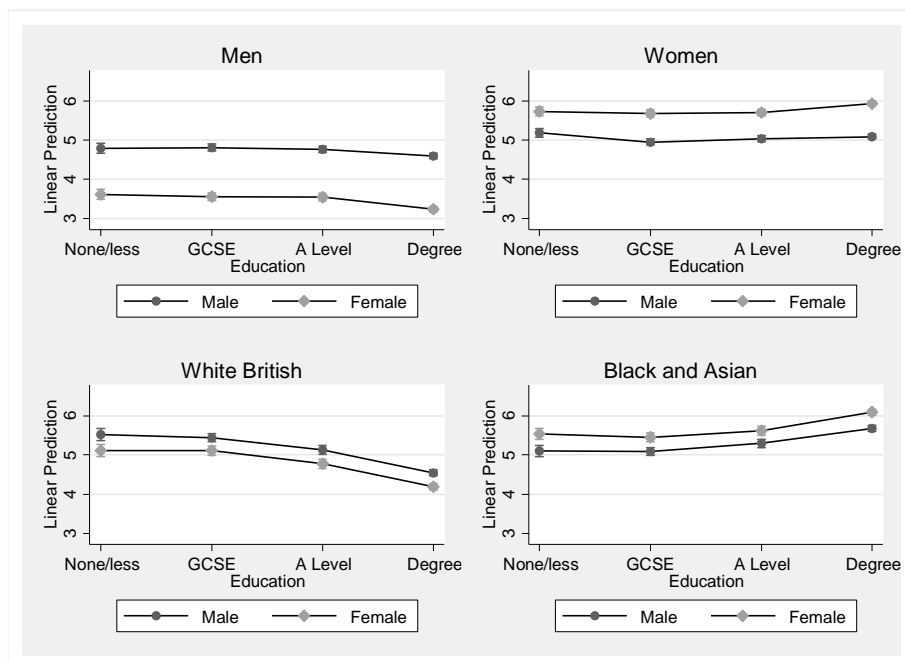

Figure A.1(e): Predicted discrimination attitudes for men and women, by subjective social class (including controls for left-right and liberal-authoritarian values)

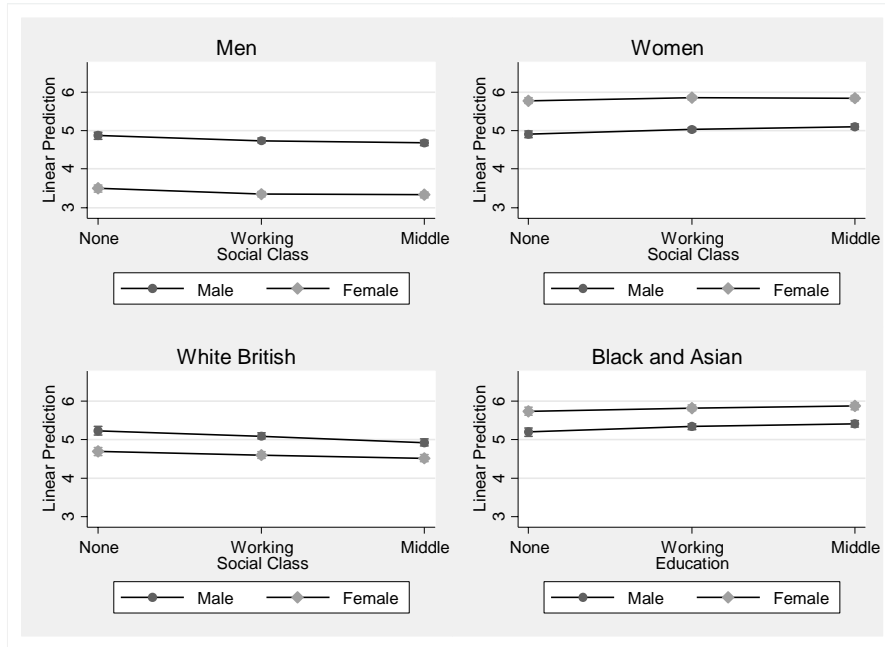

Figure A2 (a): Polynomial distribution of male discrimination perceptions by gender and age

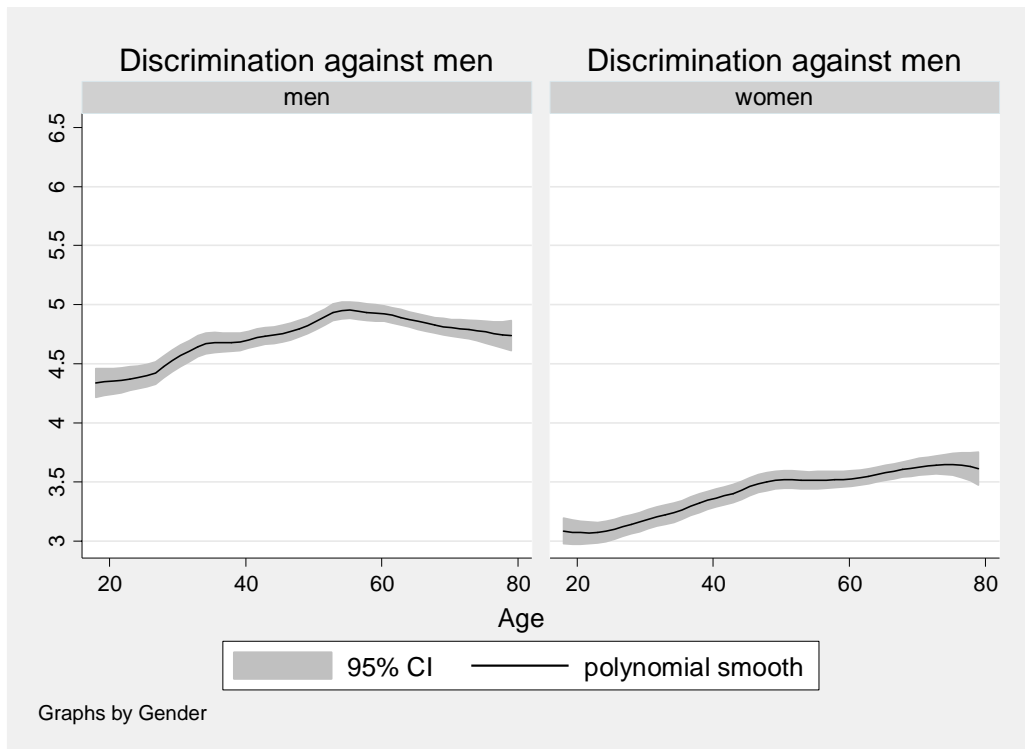

Figure A2 (b): Polynomial distribution of female discrimination perceptions by gender and age

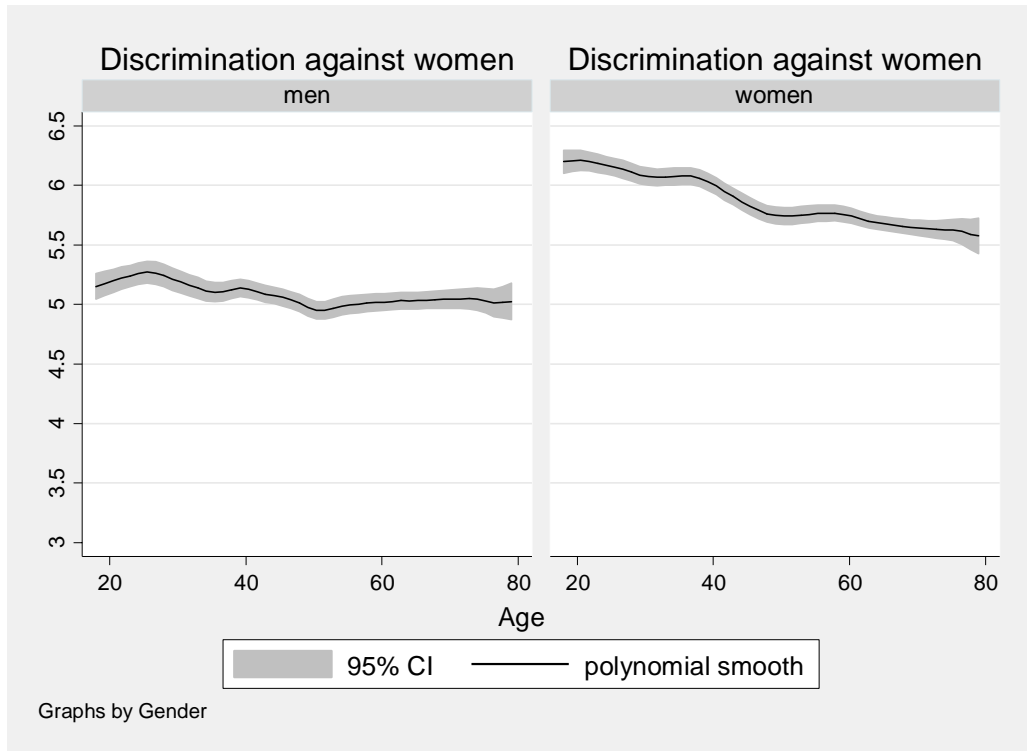

Table A.3. Logistic regression model of EU referendum vote by all four discrimination measures interacted with gender (figure 4 in the main paper)

|                                               | Men                 | Women               | White British       | Black and Asian     |
|-----------------------------------------------|---------------------|---------------------|---------------------|---------------------|
| Discrimination against men                    | 0.195<br>(0.014)**  |                     |                     |                     |
| Gender                                        | 0.369<br>(0.094)**  | -0.419<br>(0.127)** | 0.085<br>(0.095)    | -0.401<br>(0.112)** |
| Discrimination against men*Gender             | -0.097<br>(0.020)** |                     |                     |                     |
| Age                                           | 0.019<br>(0.001)**  | 0.019<br>(0.001)**  | 0.017<br>(0.001)**  | 0.018<br>(0.001)**  |
| Income                                        | -0.004<br>(0.004)   | -0.003<br>(0.004)   | -0.005<br>(0.004)   | -0.005<br>(0.004)   |
| GCSE                                          | -0.269<br>(0.074)** | -0.285<br>(0.074)** | -0.277<br>(0.075)** | -0.290<br>(0.075)** |
| A-Level                                       | -0.324<br>(0.075)** | -0.335<br>(0.075)** | -0.313<br>(0.075)** | -0.351<br>(0.075)** |
| Degree                                        | -0.656<br>(0.070)** | -0.663<br>(0.070)** | -0.627<br>(0.071)** | -0.665<br>(0.071)** |
| Libertarian-Authoritarian Values              | 0.224<br>(0.012)**  | 0.233<br>(0.011)**  | 0.198<br>(0.012)**  | 0.224<br>(0.012)**  |
| Immigration Attitudes                         | -0.552<br>(0.014)** | -0.550<br>(0.013)** | -0.517<br>(0.014)** | -0.518<br>(0.014)** |
| British identity                              | 0.128<br>(0.014)**  | 0.130<br>(0.014)**  | 0.127<br>(0.014)**  | 0.135<br>(0.014)**  |
| Discrimination against women                  |                     | -0.108<br>(0.015)** |                     |                     |
| Discrimination against women*Gender           |                     | 0.047<br>(0.022)*   |                     |                     |
| Discrimination against white British          |                     |                     | 0.230<br>(0.013)**  |                     |
| Discrimination against white British*Gender   |                     |                     | -0.044<br>(0.018)*  |                     |
| Discrimination against Black and Asian        |                     |                     |                     | -0.188<br>(0.013)** |
| Discrimination against Black and Asian*Gender |                     |                     |                     | 0.045<br>(0.018)*   |
| Constant                                      | -1.316<br>(0.168)** | 0.113<br>(0.173)    | -1.401<br>(0.167)** | 0.550<br>(0.169)**  |
| N                                             | 17,455              | 17,455              | 17,455              | 17,455              |

\*  $p < 0.05$ ; \*\*  $p < 0.01$



Figure A3. Marginal effect on voting leave across perceptions of discrimination against men, by gender, age, and employment status

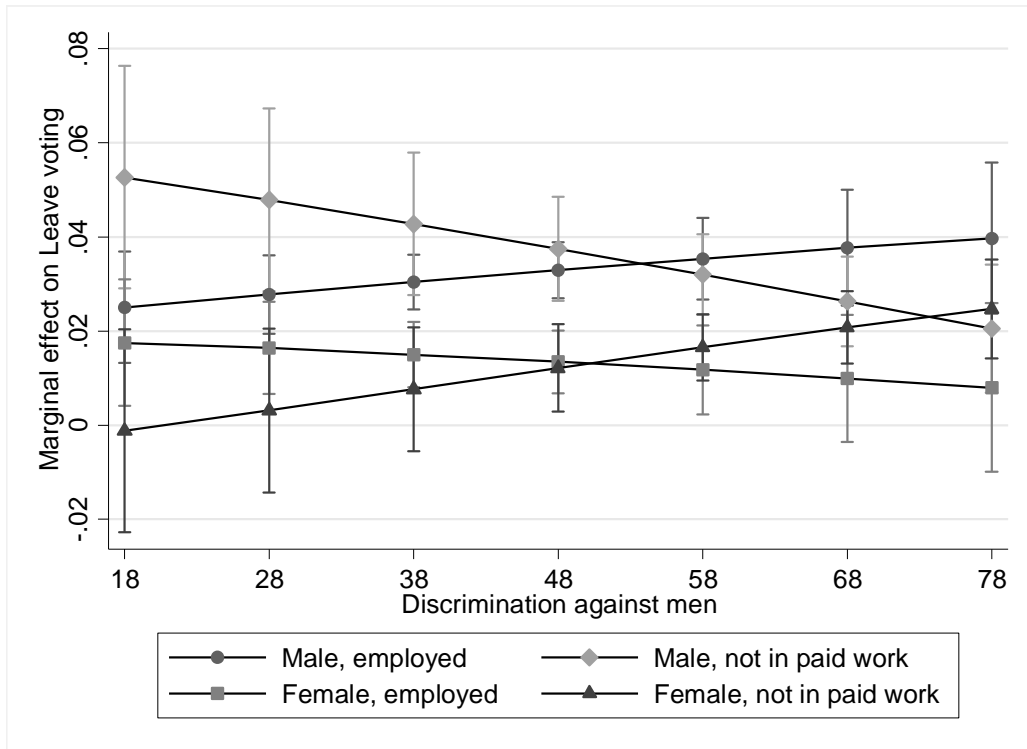

Figure A4: OLS regression with EU integration preferences scale as dependent variable, with same model specification as table A3.

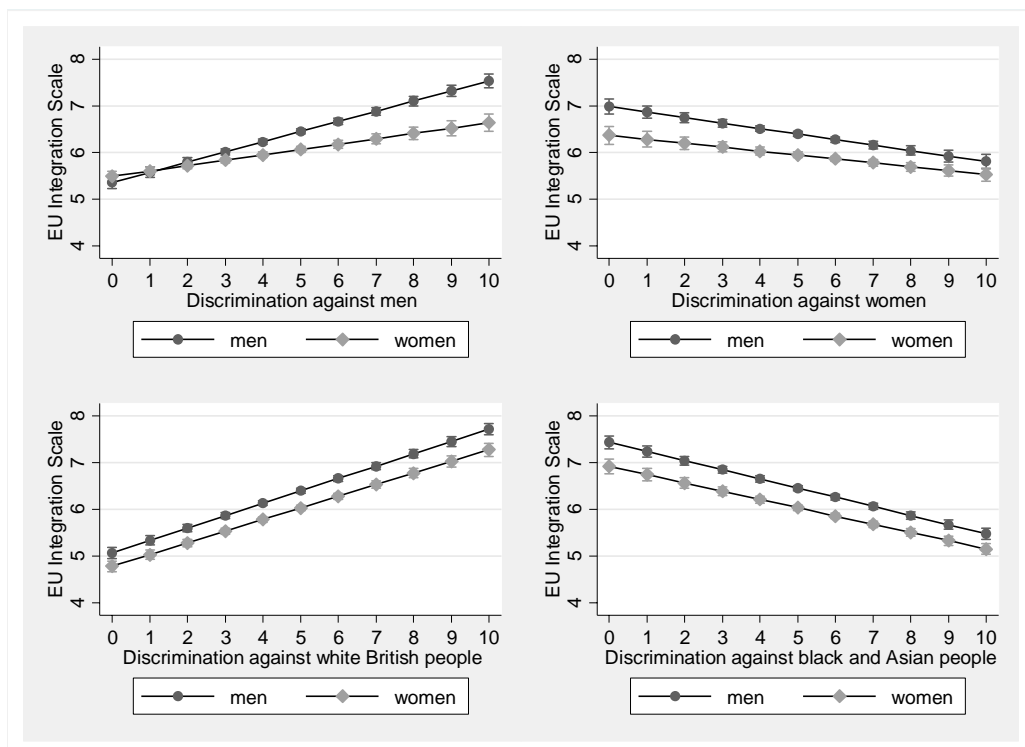

Supplement: MOESM1 [file 19034912]
